# Supplementary material for: Tropical dry forest response to nutrient fertilization: a model validation and sensitivity analysis
Source: Copernicus journal article supplement (doi:10.5194/bg-21-455-2024), 2024-01-24
Supplement: Supplementary file 1 [file bg-21-455-2024-supplement.pdf]

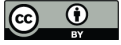

*Supplement of*

## **Tropical dry forest response to nutrient fertilization: a model validation and sensitivity analysis**

**Shuyue Li et al.**

*Correspondence to:* David Medvigy (dmedvigy@nd.edu)

The copyright of individual parts of the supplement might differ from the article licence.



**Supplement Table S3. As for Table 1, but for fine root production.**

| <b>Fine</b>       | <b>Root</b> | <b>a=0</b> | <b>a=0.1</b> | <b>a=0.2</b> | <b>a=0.3</b> | <b>a=0.4</b> | <b>a=0.5</b> | <b>a=0.6</b> | <b>a=0.7</b> | <b>a=0.8</b> |
|-------------------|-------------|------------|--------------|--------------|--------------|--------------|--------------|--------------|--------------|--------------|
| <b>Production</b> |             |            |              |              |              |              |              |              |              |              |
| <b>b = -60</b>    |             | CN,PNP     | CN,PNP       | CN,PNP       | CN,PNP       | CN,PNP       | PNP          | PNP          | CN,PNP       | CN,PNP       |
| <b>b = -40</b>    |             | CN,PNP     | CN,PNP       | CN,PNP       | CN,PNP       | CN,PNP       | PNP          | PNP          | CN,PNP       | CN           |
| <b>b = -20</b>    |             | CN,PNP     | CN,PNP       | CN,PNP       | CN,PNP       | CN,PNP       | PNP          | PNP          | CN           | CN           |
| <b>b = 0</b>      |             | CN,PNP     | CN,PNP       | CN,PNP       | CN,PNP       | CN,PNP       | PNP          | PNP          | CN           | CN           |
| <b>b = 20</b>     |             | CN,PNP     | CN,PNP       | CN,PNP       | CN,PNP       | -            | -            | CN           | CN,PNP       | CN,PNP       |
| <b>b = 40</b>     |             | CN,PNP     | CN           | CN           | -            | PNP          | PNP          | CN,PNP       | CN,PNP       | CN,PNP       |
| <b>b = 60</b>     |             | CN         | CN,PNP       | PNP          | PNP          | PNP          | CN,PNP       | CN,PNP       | CN,PNP       | CN,PNP       |
